# Supplementary material for: Gender bias and sex-based differences in health care efficiency in Polish regions
Source: Springer Nature journal article supplement (doi:10.1186/s12939-016-0501-y), 2017-01-11
Supplement: MOESM2 [file 11992176]

**Table A2. Variables definitions and descriptive statistics**

| Variable                        | Definition [measurement unit]                                                                             | Mean |      | Stand. deviation |      | Minimum |      | Maximum |      |
|---------------------------------|-----------------------------------------------------------------------------------------------------------|------|------|------------------|------|---------|------|---------|------|
|                                 |                                                                                                           | 2002 | 2013 | 2002             | 2013 | 2002    | 2013 | 2002    | 2013 |
| Years                           |                                                                                                           | 2002 | 2013 | 2002             | 2013 | 2002    | 2013 | 2002    | 2013 |
| LE_F_0                          | Female life expectancy at birth [years]                                                                   | 78.9 | 81.1 | 0.7              | 1.0  | 77.9    | 80.1 | 80.4    | 82.4 |
| LE_F_15                         | Female life expectancy at 15 [years]                                                                      | 64.6 | 66.6 | 0.6              | 1.0  | 63.6    | 65.5 | 65.9    | 67.8 |
| LE_F_30                         | Female life expectancy at 30 [years]                                                                      | 49.8 | 51.8 | 0.6              | 0.9  | 48.9    | 50.8 | 51.2    | 52.9 |
| LE_F_45                         | Female life expectancy at 45 [years]                                                                      | 35.4 | 37.2 | 0.6              | 0.8  | 34.6    | 36.3 | 36.7    | 38.3 |
| LE_F_60                         | Female life expectancy at 60 [years]                                                                      | 22.2 | 23.8 | 0.5              | 0.6  | 21.6    | 23.1 | 23.3    | 24.8 |
| LE_F_65                         | Female life expectancy at 65 [years]                                                                      | 18.1 | 19.7 | 0.4              | 0.5  | 17.6    | 19.2 | 19.1    | 20.6 |
| LE_M_0                          | Male life expectancy at birth [years]                                                                     | 70.4 | 73.0 | 0.9              | 0.8  | 68.5    | 70.7 | 72.1    | 74.8 |
| LE_M_15                         | Male life expectancy at 15 [years]                                                                        | 56.2 | 58.5 | 0.9              | 0.7  | 54.3    | 56.2 | 57.8    | 60.3 |
| LE_M_30                         | Male life expectancy at 30 [years]                                                                        | 42.0 | 44.2 | 0.8              | 0.7  | 40.2    | 42.0 | 43.5    | 45.9 |
| LE_M_45                         | Male life expectancy at 45 [years]                                                                        | 28.5 | 30.4 | 0.6              | 0.7  | 27.1    | 28.8 | 29.6    | 31.9 |
| LE_M_60                         | Male life expectancy at 60 [years]                                                                        | 17.1 | 18.6 | 0.5              | 0.5  | 16.5    | 17.8 | 17.9    | 19.7 |
| LE_M_65                         | Male life expectancy at 65 [years]                                                                        | 14.0 | 15.4 | 0.4              | 0.4  | 13.3    | 14.7 | 14.7    | 16.2 |
| Years                           |                                                                                                           | 1999 | 2010 | 1999             | 2010 | 1999    | 2010 | 1999    | 2010 |
| Doctors' density                | Number of doctors employed in health care per 1,000 population [employed persons]                         | 2.18 | 2.02 | 0.41             | 0.28 | 1.52    | 1.45 | 2.77    | 2.41 |
| Education_F                     | Share of female population aged 15-64 with tertiary education level [percentage]                          | 9.3  | 21.8 | 1.6              | 3.1  | 6.7     | 16.8 | 12.2    | 31.3 |
| Education_M                     | Share of male population aged 15-64 with tertiary education level [percentage]                            | 7.9  | 15.1 | 1.5              | 2.5  | 5.9     | 12.5 | 11.0    | 23.3 |
| Income                          | Average monthly real disposable income [zlotys <sup>a</sup> 2010]                                         | 818  | 1150 | 89               | 149  | 704     | 907  | 1027    | 1602 |
| Services employment_F           | Share of total female employment working in services sector [percentage]                                  | 62.8 | 70.2 | 7.7              | 5.6  | 50.8    | 61.8 | 73.8    | 78.9 |
| Services employment_M           | Share of total male employment working in services sector [percentage]                                    | 40.8 | 42.7 | 5.2              | 5.1  | 31.9    | 36.3 | 49.2    | 55.6 |
| Housing conditions <sup>b</sup> | Average useable floor space of dwelling [square meters]                                                   | 68.8 | 73.3 | 4.4              | 4.3  | 63.9    | 67.5 | 76.0    | 80.2 |
| Pollution                       | Emission of sulphur dioxide (SO <sub>2</sub> ) per square kilometre [tones/year]                          | 4.06 | 1.78 | 5.01             | 1.95 | 0.33    | 0.16 | 16.5    | 7.50 |
| Alcohol and tobacco             | Average monthly household real <sup>c</sup> expenditure on alcohol and tobacco [zlotys <sup>a</sup> 2010] | 27.4 | 26.6 | 4.0              | 5.6  | 19.4    | 18.1 | 32.0    | 36.2 |
| Physical activity_F             | Female members of sport clubs per 1,000 population                                                        | 7.7  | 11.1 | 2.1              | 2.4  | 4.3     | 8.1  | 10.9    | 15.8 |
| Physical activity_M             | Male members of sport clubs per 1,000 population                                                          | 23.9 | 35.0 | 6.1              | 7.2  | 13.9    | 26.9 | 34.5    | 54.8 |

Source: own calculations based on [20]. Notes: a – the zloty is the Polish monetary unit; the average 1999 exchange rate was 3.97 zlotys per 1 US dollar; the average 2010 exchange rate was 3.02 zlotys per 1 US dollar; b - due to data limitations the variable "Housing" is not used in a lagged form, thus, the data provided refers to years 2002 and 2013 not to years 1999 and 2010 as in the case of other covariates; c - to incorporate the fact that the prices of tobacco were

rising more rapidly than the prices of other goods and services the specific consumer price index (CPI) for alcohol and tobacco is used to deflate the expenditures in this category instead of general CPI index.
