# Supplementary material for: Gender bias and sex-based differences in health care efficiency in Polish regions
Source: Springer Nature journal article supplement (doi:10.1186/s12939-016-0501-y), 2017-01-11

**Figure A1. Female and male life expectancy (LE) at birth in Poland and OECD countries**

Panels A and B show dynamics of female and male life expectancy in Poland, four other countries of the region and OECD average. Panel C shows gender gap in life expectancy in OECD countries. Source: [21].

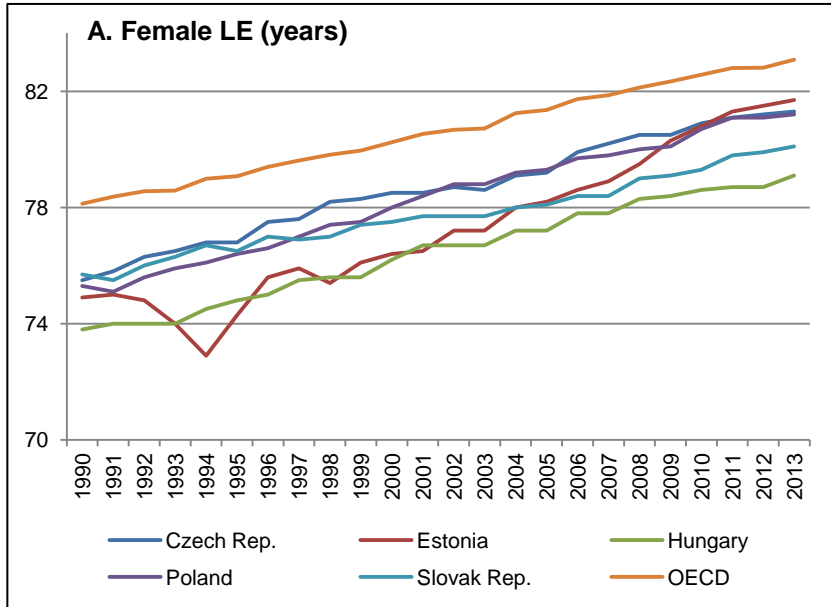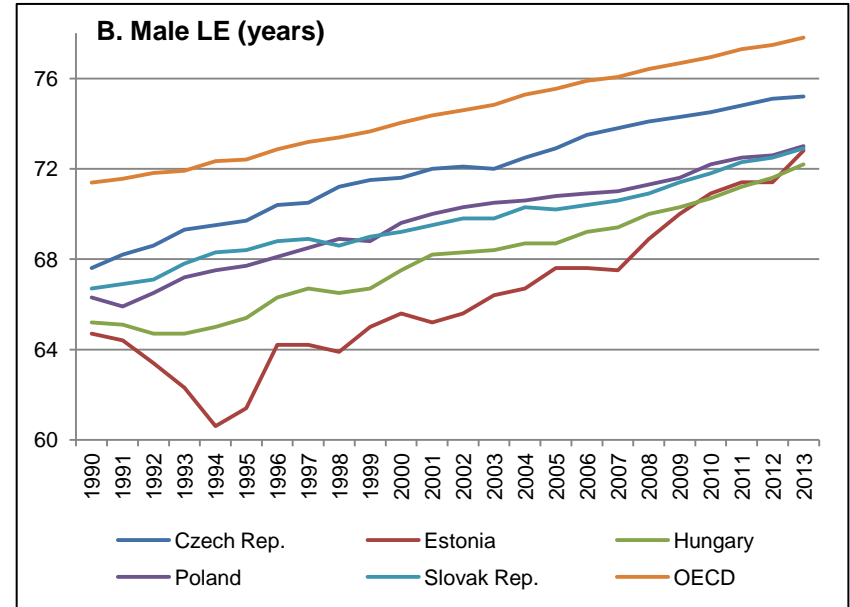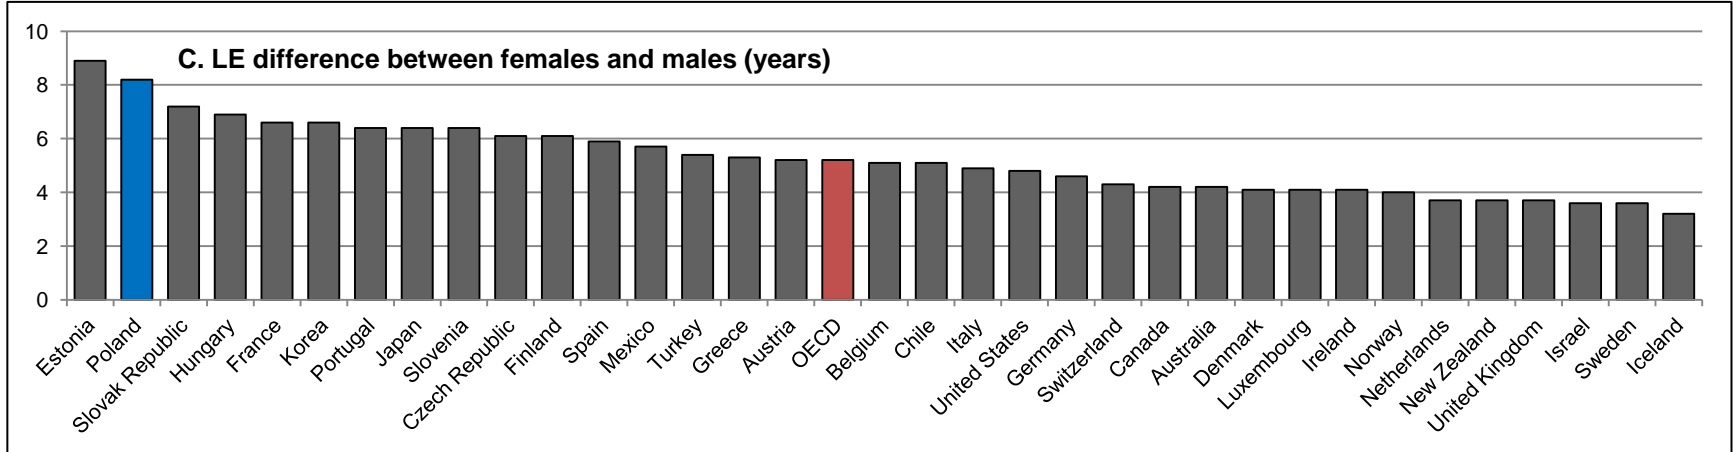

Supplement: MOESM3 [file 11992176]
