# Supplementary material for: Gender bias and sex-based differences in health care efficiency in Polish regions
Source: Springer Nature journal article supplement (doi:10.1186/s12939-016-0501-y), 2017-01-11

**Figure A2. Health expenditure and doctor availability in Poland and OECD countries**

Panel A shows dynamics of current health expenditure in Poland, four other countries of the region and OECD average. Panel B shows dynamics of doctor density in the same countries. Panel C shows annual growth rate of health expenditure in OECD countries. Source: [21].

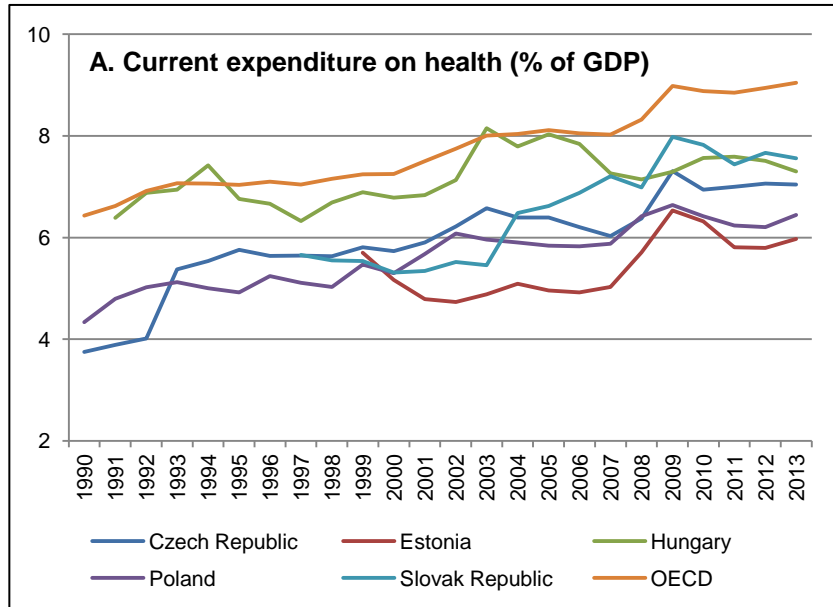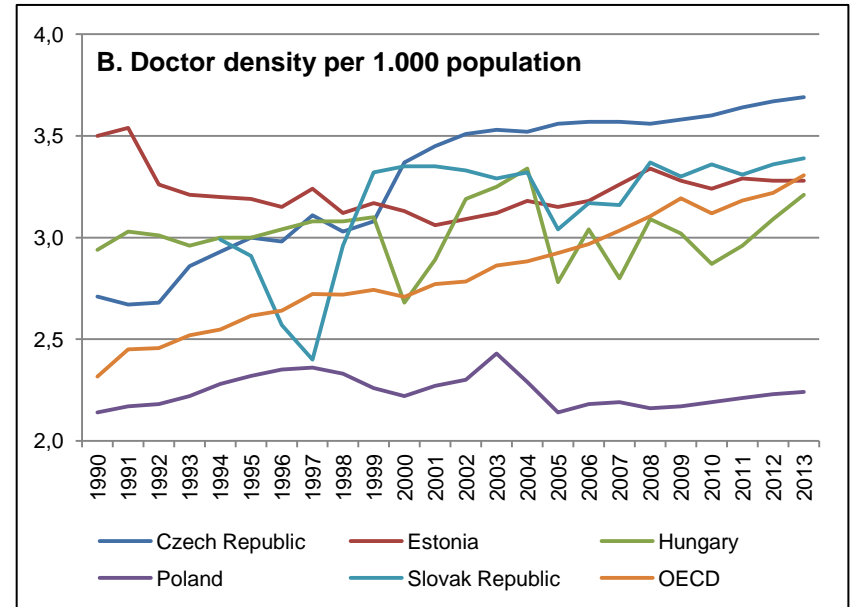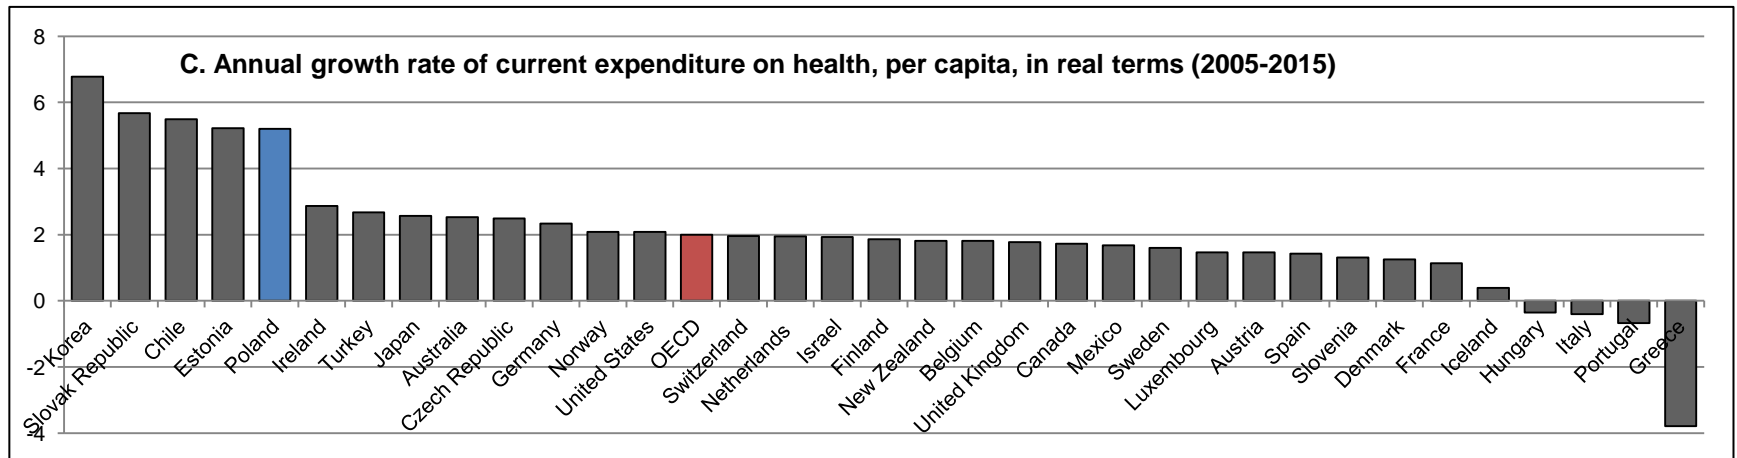

Supplement: MOESM4 [file 11992176]
