# Supplementary material for: Gender bias and sex-based differences in health care efficiency in Polish regions
Source: Springer Nature journal article supplement (doi:10.1186/s12939-016-0501-y), 2017-01-11

**Figure A3. Share of respondents with unmet needs due to reasons: too expensive, too far, waiting list. Source: [28]**

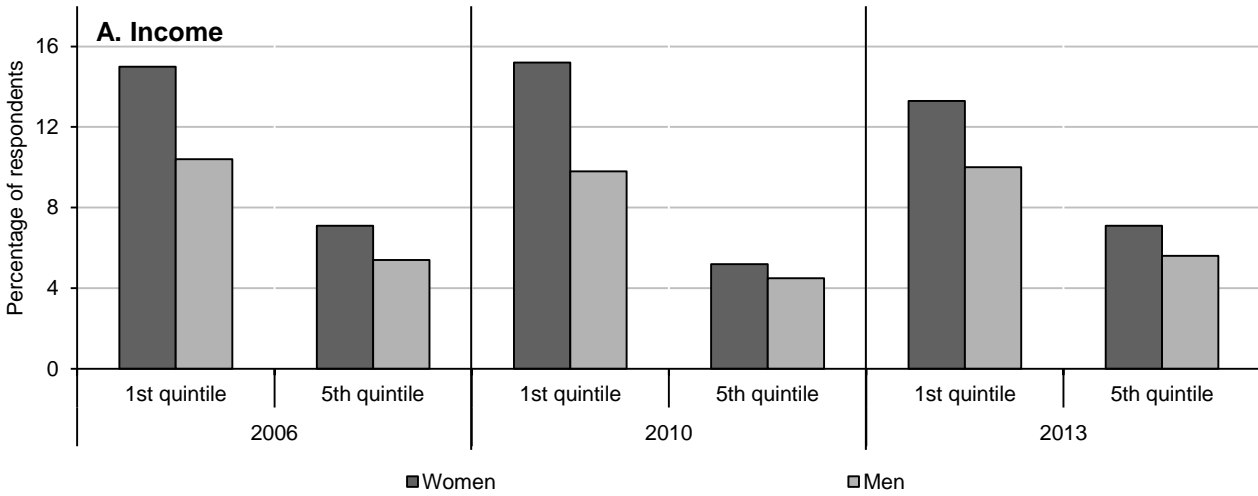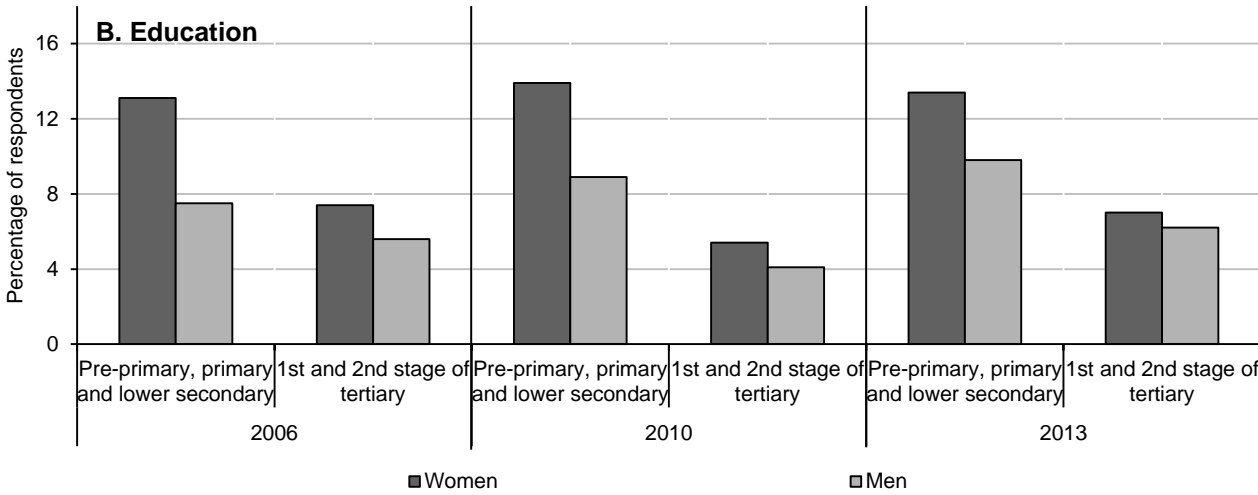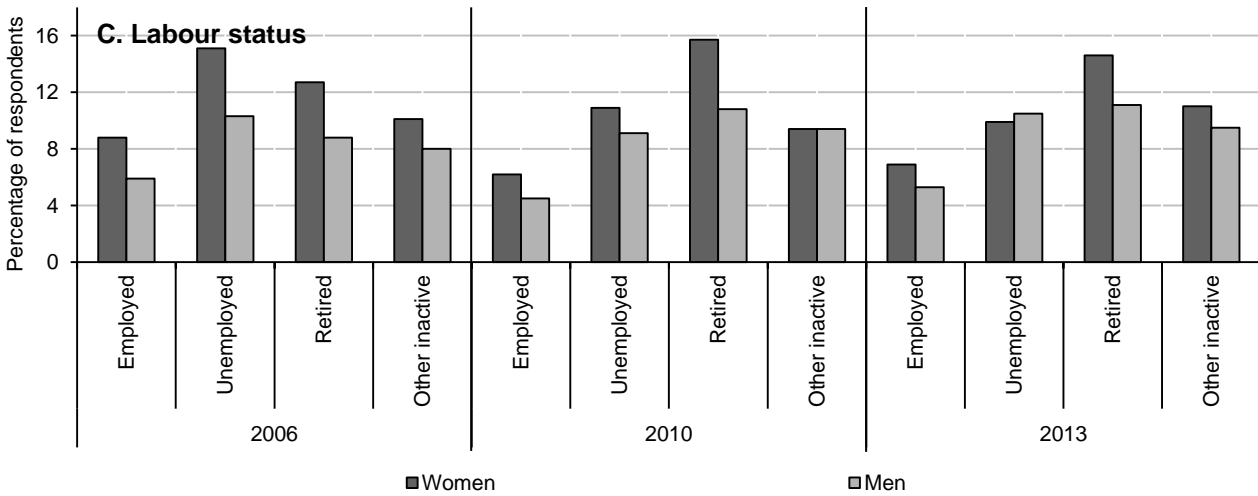

Supplement: MOESM6 [file 11992176]
